# Supplementary material for: Comparative genomics reveals insight into the evolutionary origin of massively scrambled genomes
Source: eLife journal article supplement (doi:10.7554/elife.82979), 2022-11-24
Supplement: supp [file elife-82979-supp-v1.zip]

Archive with 26 entries (26 files):
- elife_poa_e82979_Figure_2_figure_supplement_1.pdf
- elife_poa_e82979_Figure_2_figure_supplement_2.png
- elife_poa_e82979_Figure_3_figure_supplement_1.pdf
- elife_poa_e82979_Figure_3_figure_supplement_2.pdf
- elife_poa_e82979_Figure_4_figure_supplement_1.pdf
- elife_poa_e82979_Figure_4_figure_supplement_2.pdf
- elife_poa_e82979_Figure_4_figure_supplement_3.pdf
- elife_poa_e82979_Figure_5_figure_supplement_1.png
- elife_poa_e82979_Figure_6_figure_supplement_1.png
- elife_poa_e82979_Figure_6_figure_supplement_2.pdf
- elife_poa_e82979_Supplementary_file_1.docx
- elife_poa_e82979_Supplementary_file_2.docx
- elife_poa_e82979_Supplementary_file_3.docx
- elife_poa_e82979_Supplementary_file_4.docx
- elife_poa_e82979_Supplementary_file_5.docx
- elife_poa_e82979_Supplementary_file_6.docx
- elife_poa_e82979_Supplementary_file_7.docx
- elife_poa_e82979_Supplementary_file_8.docx
- elife_poa_e82979_Supplementary_file_9.docx
- elife_poa_e82979_Supplementary_file_10.docx
- elife_poa_e82979_Supplementary_file_11.docx
- elife_poa_e82979_Supplementary_file_13.docx
- elife_poa_e82979_Supplementary_file_12.docx
- elife_poa_e82979_Supplementary_file_14.docx
- elife_poa_e82979_Figure_5_source_data_1.xlsx
- elife_poa_e82979_Figure_5_source_data_2.xlsx
