# Supplementary material for: Comparative genomics reveals insight into the evolutionary origin of massively scrambled genomes
Source: eLife journal article supplement (doi:10.7554/elife.82979), 2022-11-24
Supplement: supp [file elife-82979-supp-v1.zip › elife_poa_e82979_Supplementary_file_2.docx]

**Supplementary File 2.** Subcategories of repeat content in the three species.

|  |  | ***Oxytricha trifallax*** | ***Tetmemena sp.*** | ***Euplotes woodruffi*** |
| --- | --- | --- | --- | --- |
| Transposable elements | Class 2 TBE/Tec | 15.4% | 1.9% | 2.3% |
| Class 2 cut-and-paste DNA transposons (excluding TBE/Tec) | 2.8% | 0.9% | 2.8% |
| Class 1 LTR | 1.2% | 1.1% | 0.7% |
| Class 1 LINE | 1.1% | 0.1% | 0.2% |
| Class 2 *Helitron* | 0.5% | 0.0% | 0.1% |
| Class 1 SINE | 0.1% | 0.0% | 0.0% |
| Unclassified | 27.4% | 14.9% | 15.9% |
| Tandem repeats | Satellites | 0.1% | 0.1% | 0.0% |
| Simple repeats | 1.4% | 1.0% | 0.5% |
| Low-complexity | 0.4% | 0.4% | 0.2% |
| Total percentage of the MIC genome assembly | | 49.6% | 20.2% | 22.5% |
