# Supplementary material for: Comparative genomics reveals insight into the evolutionary origin of massively scrambled genomes
Source: eLife journal article supplement (doi:10.7554/elife.82979), 2022-11-24
Supplement: supp [file elife-82979-supp-v1.zip › elife_poa_e82979_Supplementary_file_8.docx]

**Supplementary File 8.** Genes with expression support in the three species

|  | Scrambled genes with any expression | Nonscrambled genes with any expression |
| --- | --- | --- |
| *Oxytricha trifallax* | 89.14% | 89.76% |
| *Tetmemena sp.* | 97.98% | 97.08% |
| *Euplotes woodruffi* | 82.46% | 93.65% |
