# Supplementary material for: Comparative genomics reveals insight into the evolutionary origin of massively scrambled genomes
Source: eLife journal article supplement (doi:10.7554/elife.82979), 2022-11-24
Supplement: supp [file elife-82979-supp-v1.zip › elife_poa_e82979_Supplementary_file_11.docx]

**Supplementary File 11.** Most pointers conserved in position are different in sequence

|  | *Oxytricha*-*Tetmemena* pointers |
| --- | --- |
| Same | 389 |
| pointer 1 contained in pointer 2 | 320 |
| pointer 2 contained in pointer 1 | 250 |
| Different | 3489 |
| Total | 4448 |
