# Supplementary figures and images for: Comparative genomics reveals insight into the evolutionary origin of massively scrambled genomes
Source: eLife journal article supplement (doi:10.7554/elife.82979), 2022-11-24

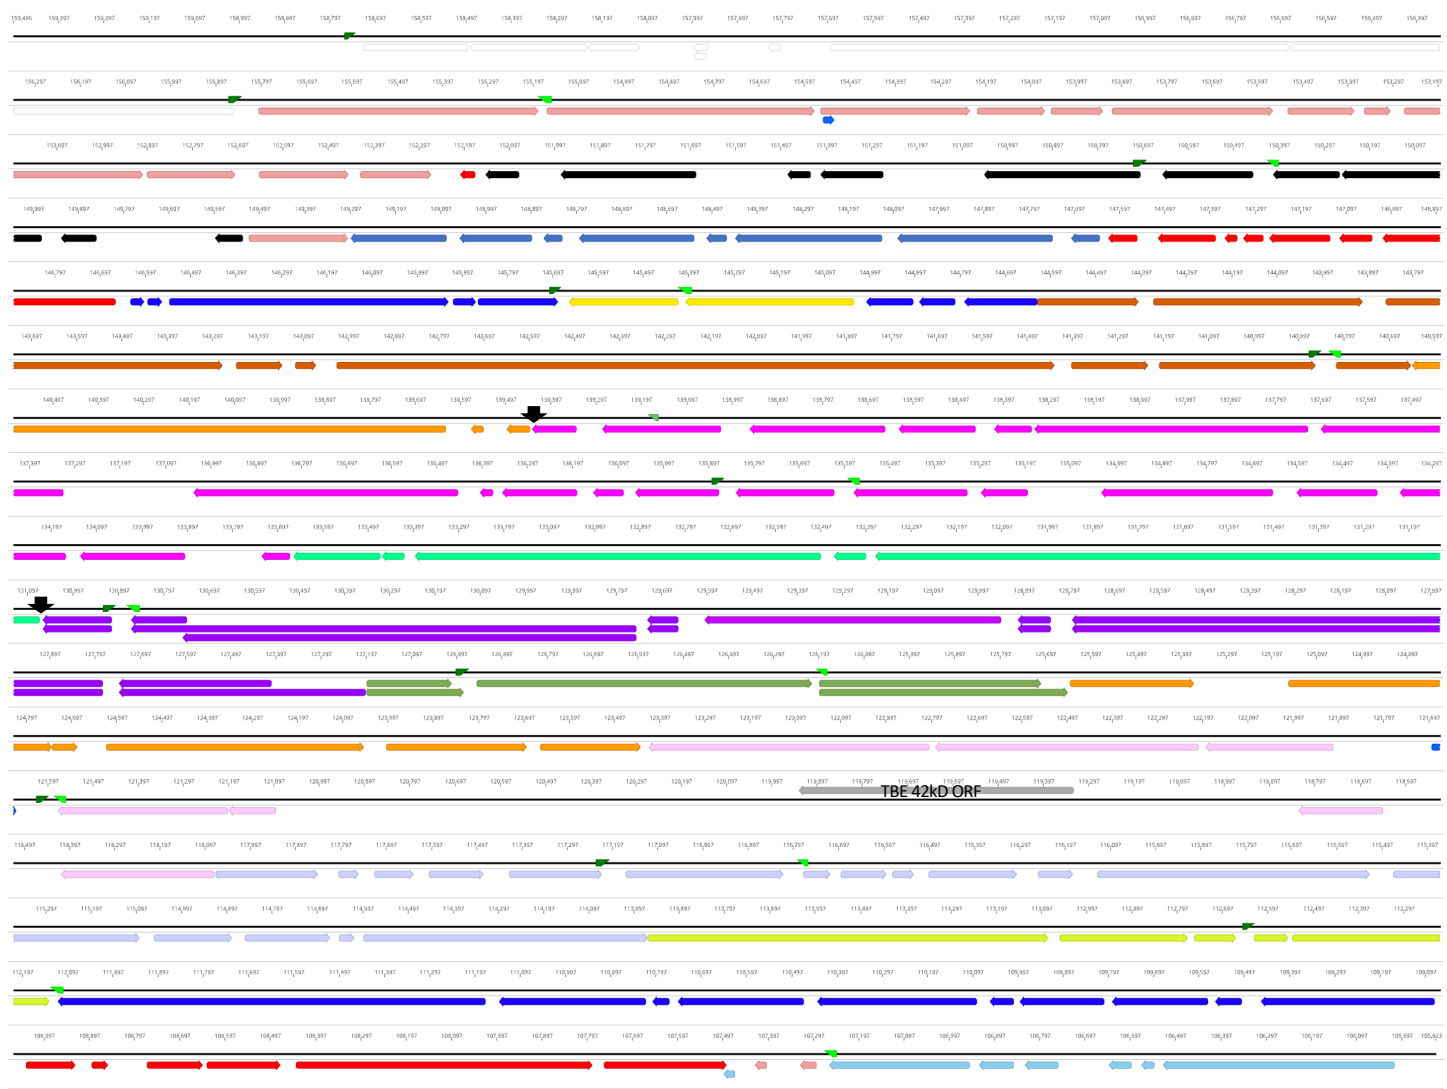

Russian doll genes

10808

04166

09313

00618 (139,443 – 140,646 bp)  
03666 (123,438 – 125,641 bp)

08901/11158

Other genes

02638

00564

11844

04978

04942

08167

00880

07156/03489

05053

05069

02448

03934

PCR Primers

Supplement: supp [file elife-82979-supp-v1.zip]

A

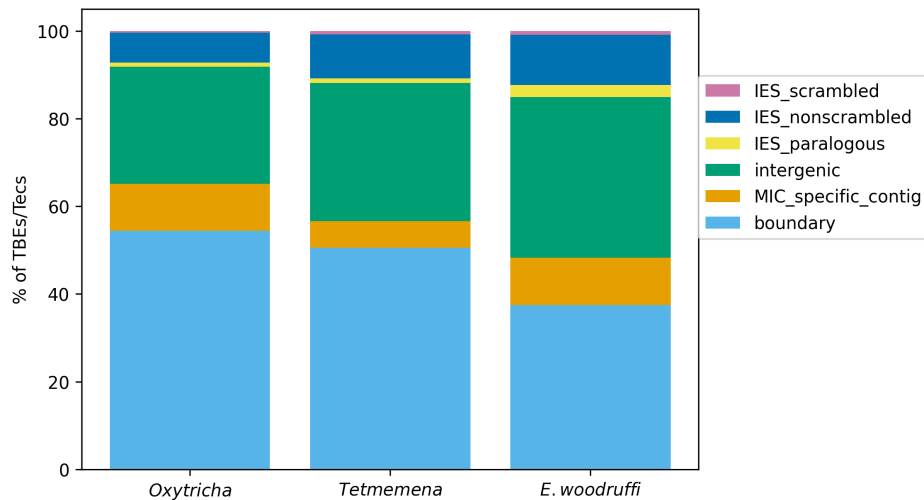

B

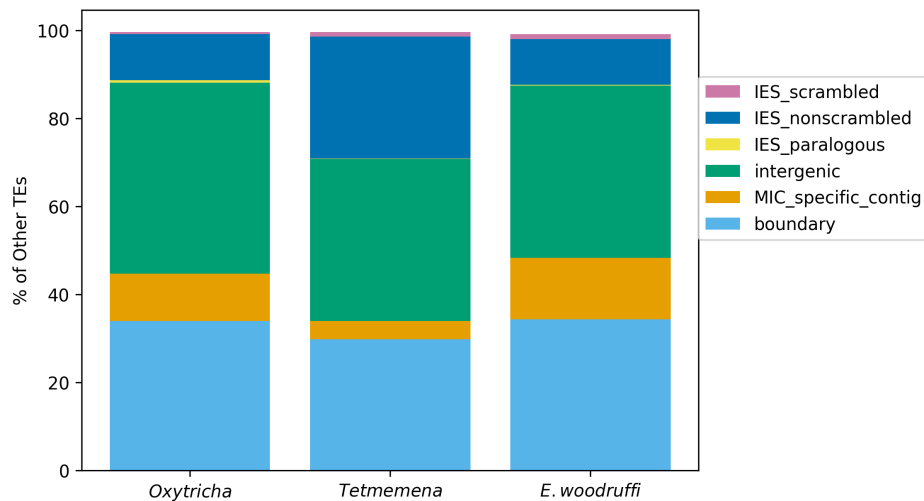

Supplement: supp [file elife-82979-supp-v1.zip › elife_poa_e82979_Figure_2_figure_supplement_1.pdf]

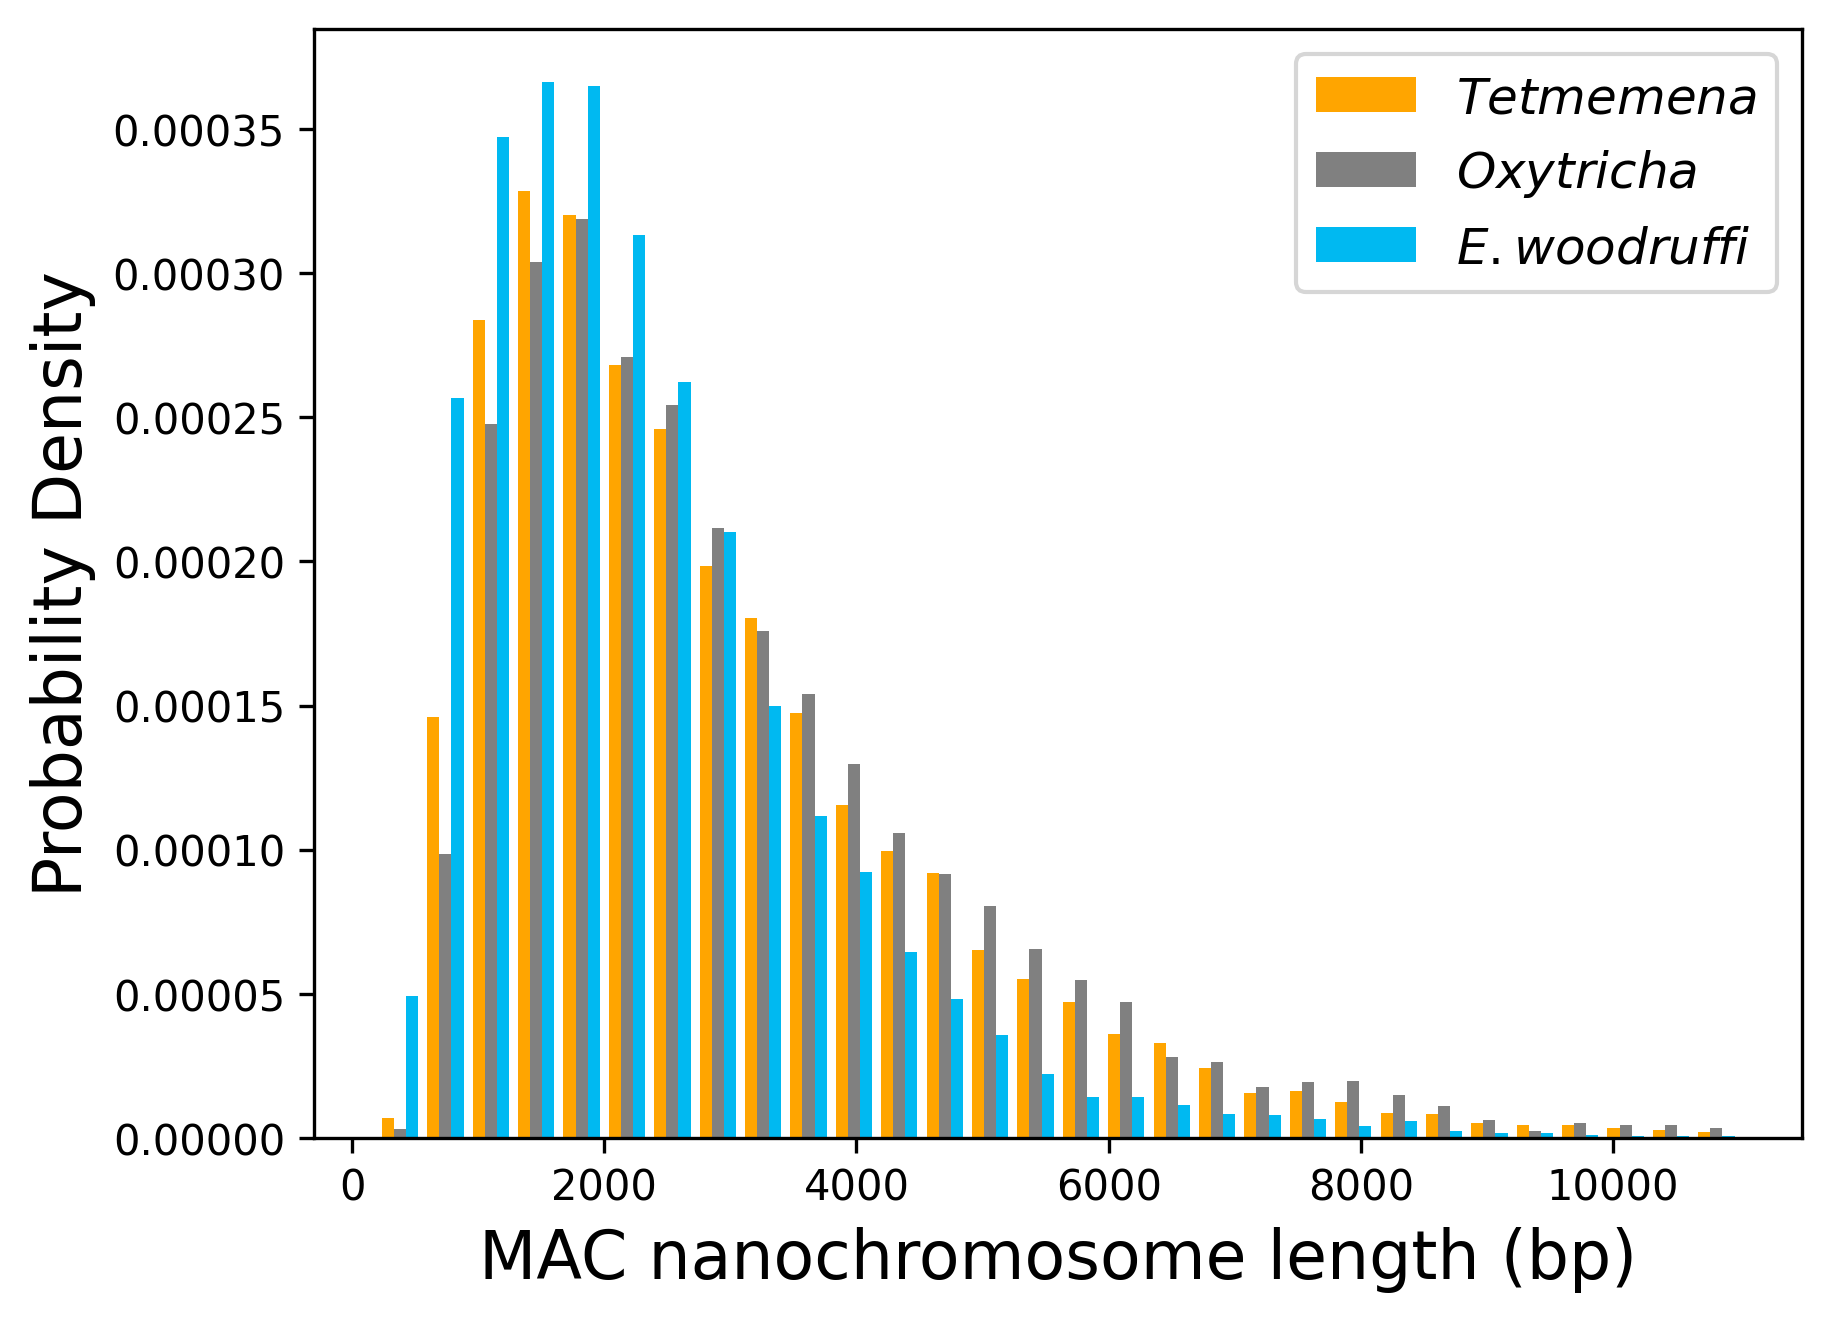

Supplement: supp [file elife-82979-supp-v1.zip › elife_poa_e82979_Figure_2_figure_supplement_2.png]

A

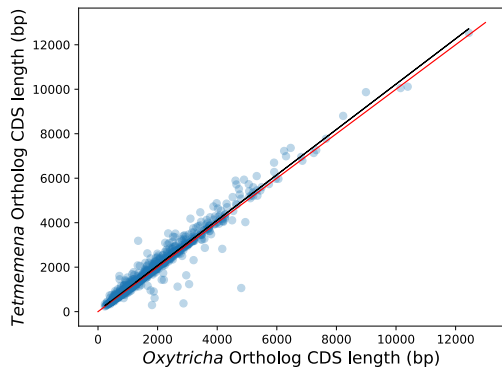

B

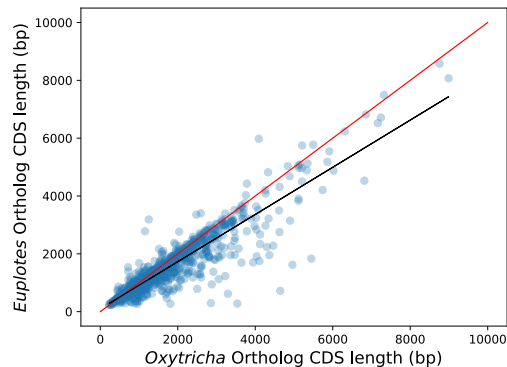

C

*Tetmemena*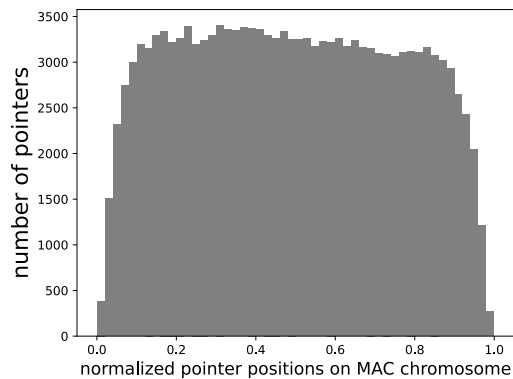

Supplement: supp [file elife-82979-supp-v1.zip › elife_poa_e82979_Figure_3_figure_supplement_1.pdf]

A

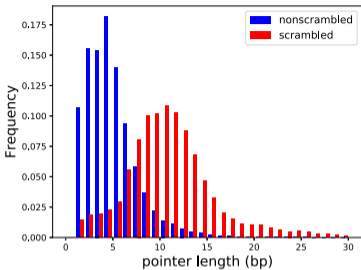

B

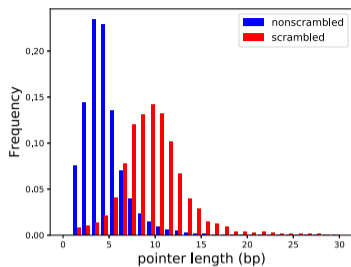

C

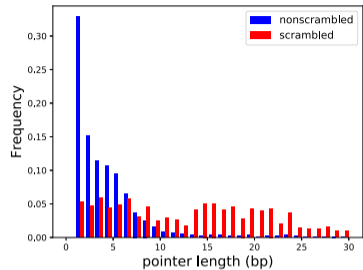

D

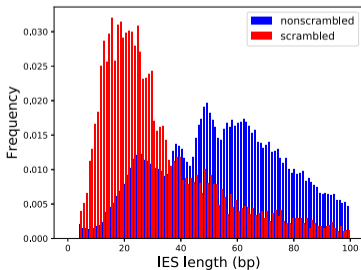

E

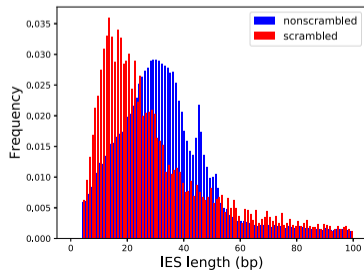

F

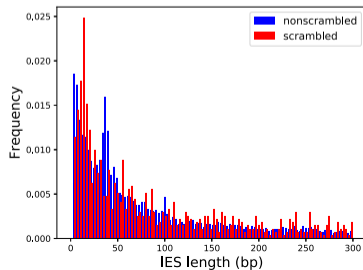

Supplement: supp [file elife-82979-supp-v1.zip › elife_poa_e82979_Figure_3_figure_supplement_2.pdf]

A

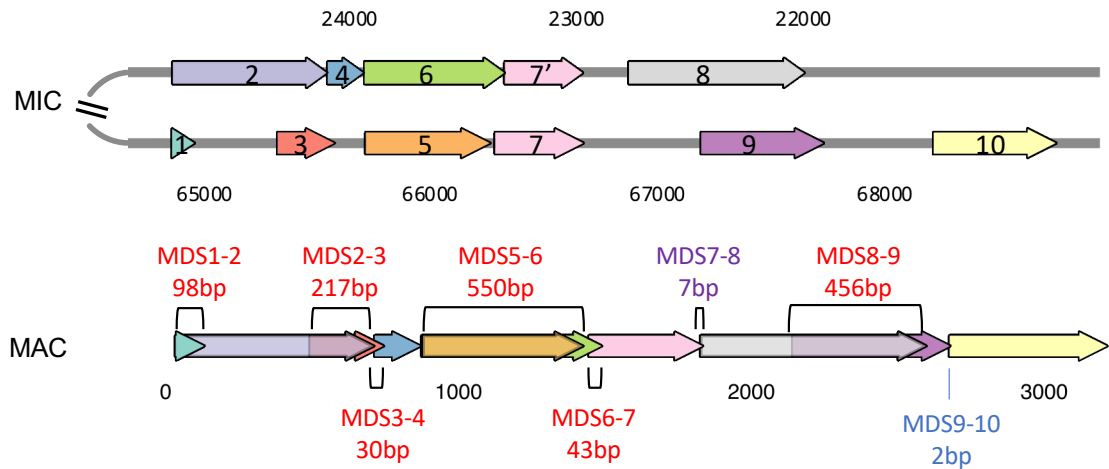

B

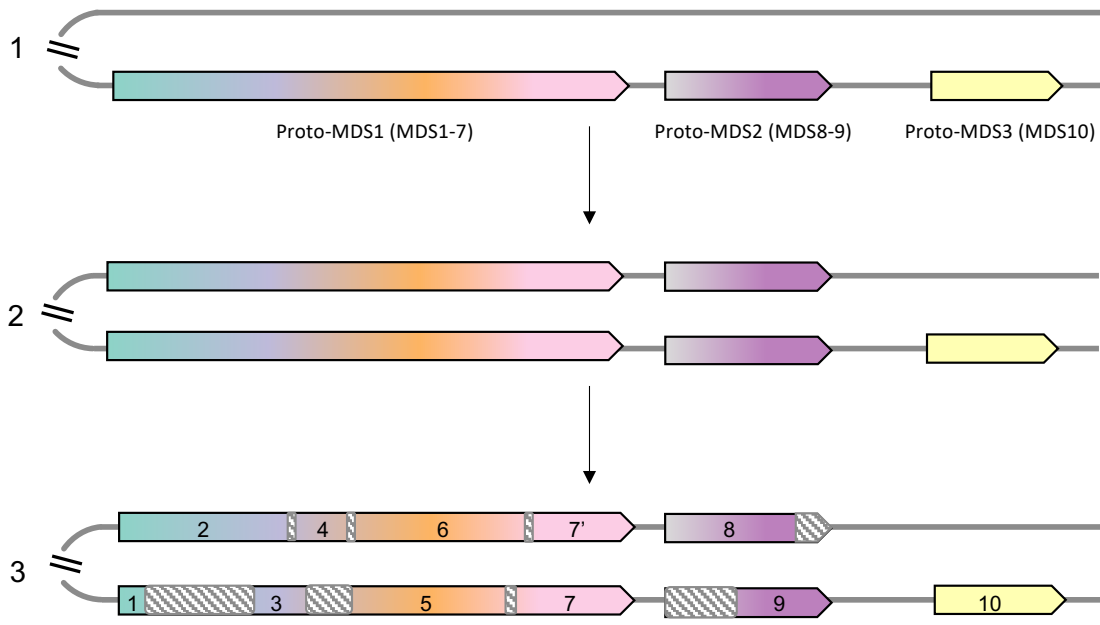

Supplement: supp [file elife-82979-supp-v1.zip › elife_poa_e82979_Figure_4_figure_supplement_1.pdf]

A

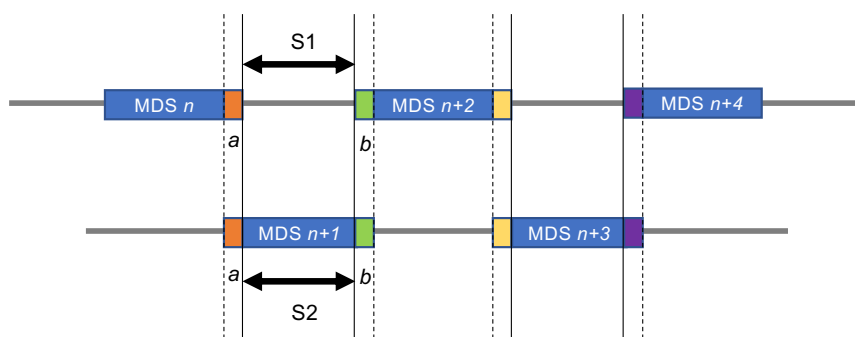

B

*E. woodruffi*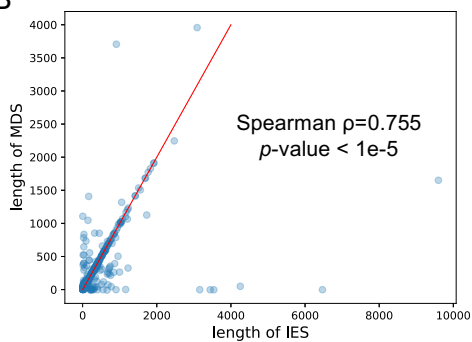

D

*Oxytricha*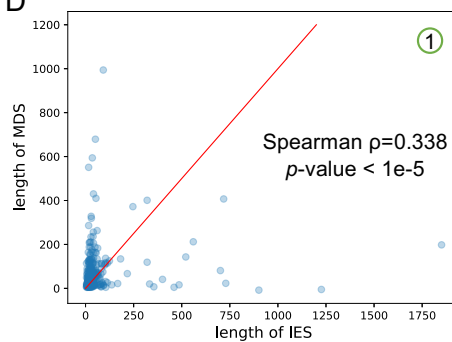

E

*Tetmemena*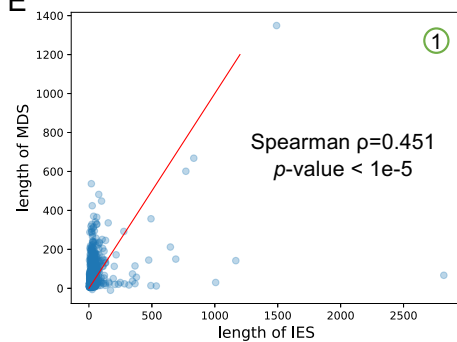

C

old → new

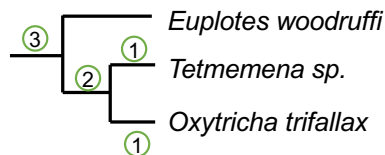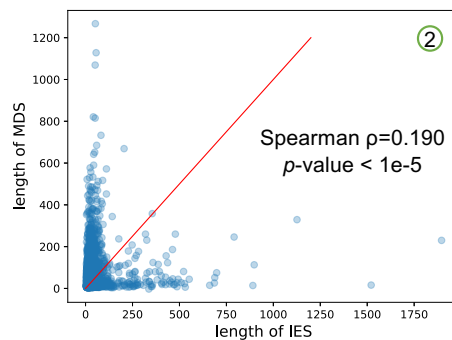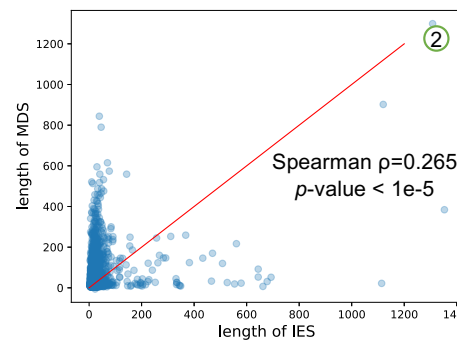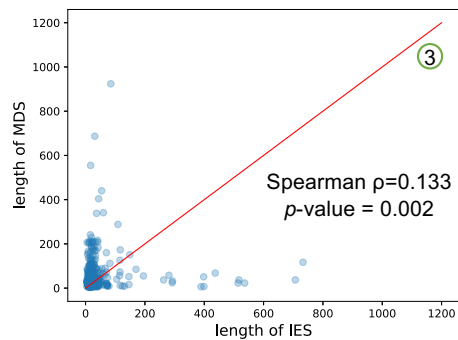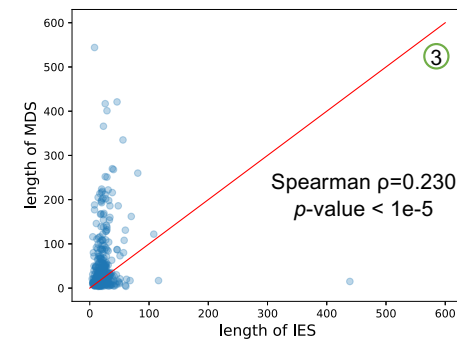

Supplement: supp [file elife-82979-supp-v1.zip › elife_poa_e82979_Figure_4_figure_supplement_2.pdf]

**A***Oxytricha*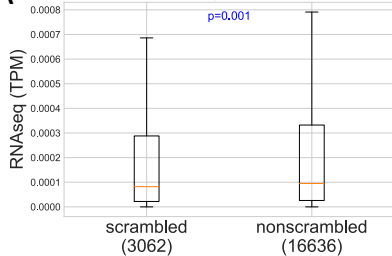**B***Tetmemena*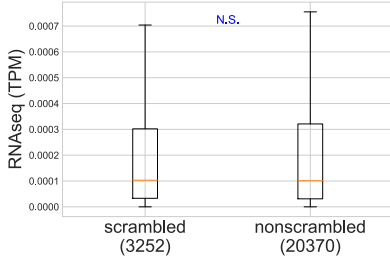**C***E. woodruffi*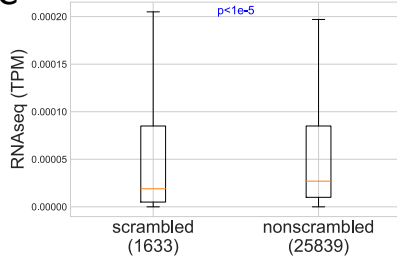

Supplement: supp [file elife-82979-supp-v1.zip › elife_poa_e82979_Figure_4_figure_supplement_3.pdf]

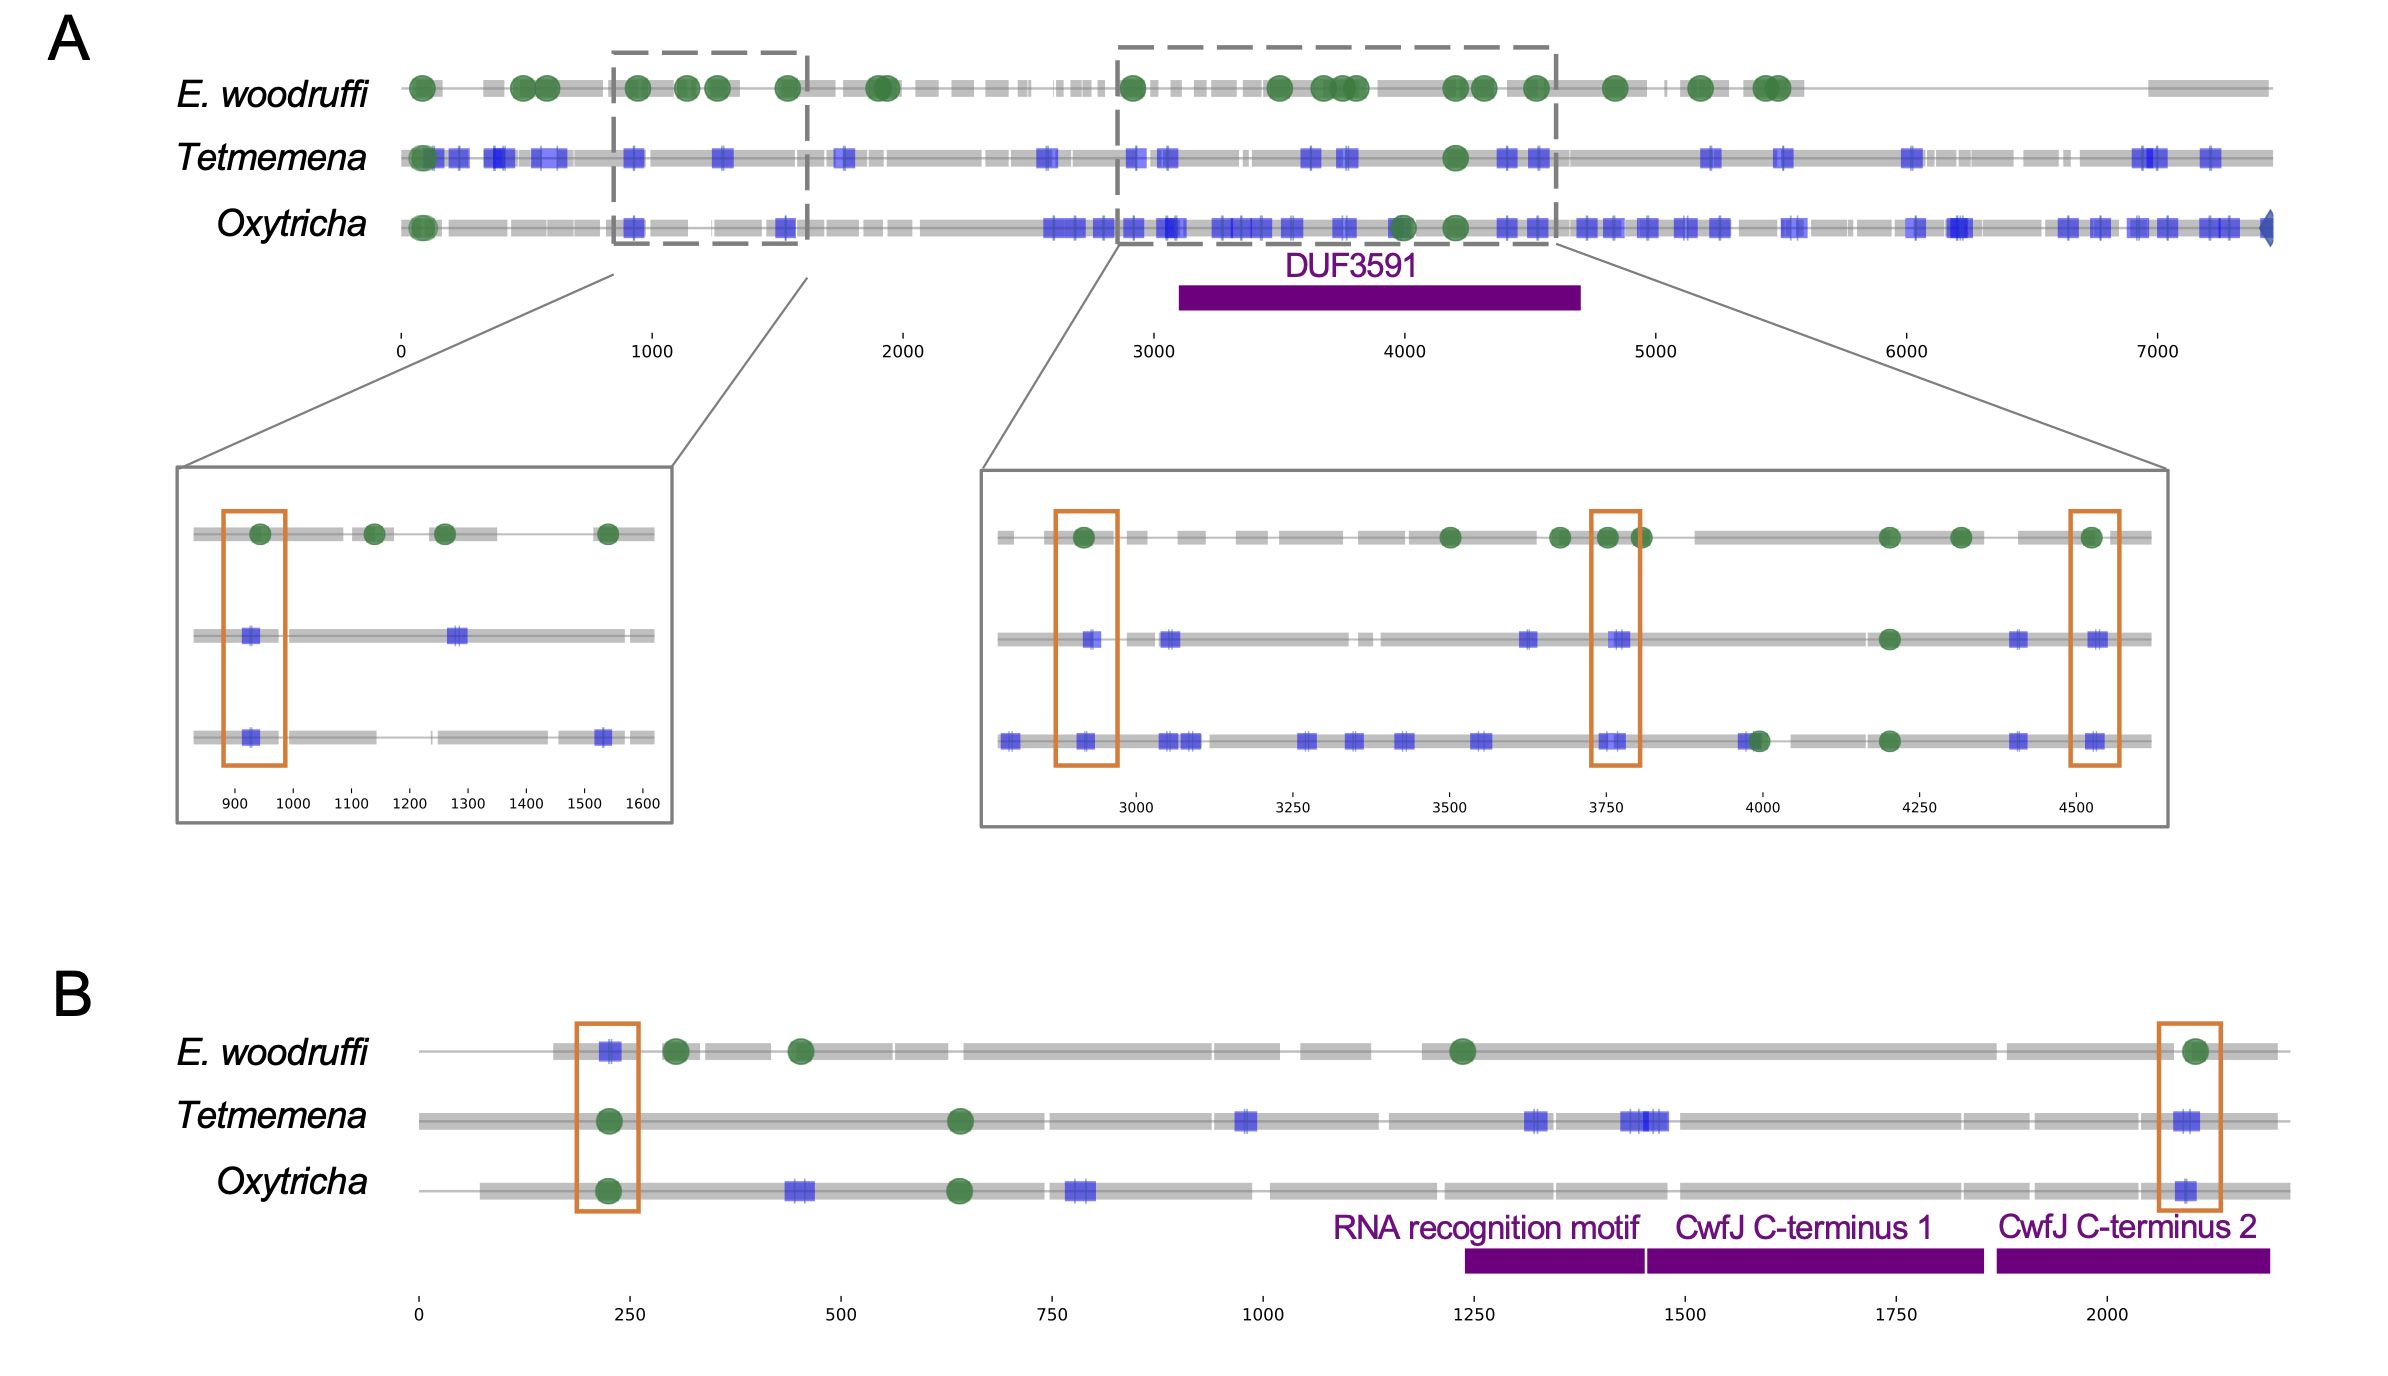

Supplement: supp [file elife-82979-supp-v1.zip › elife_poa_e82979_Figure_5_figure_supplement_1.png]

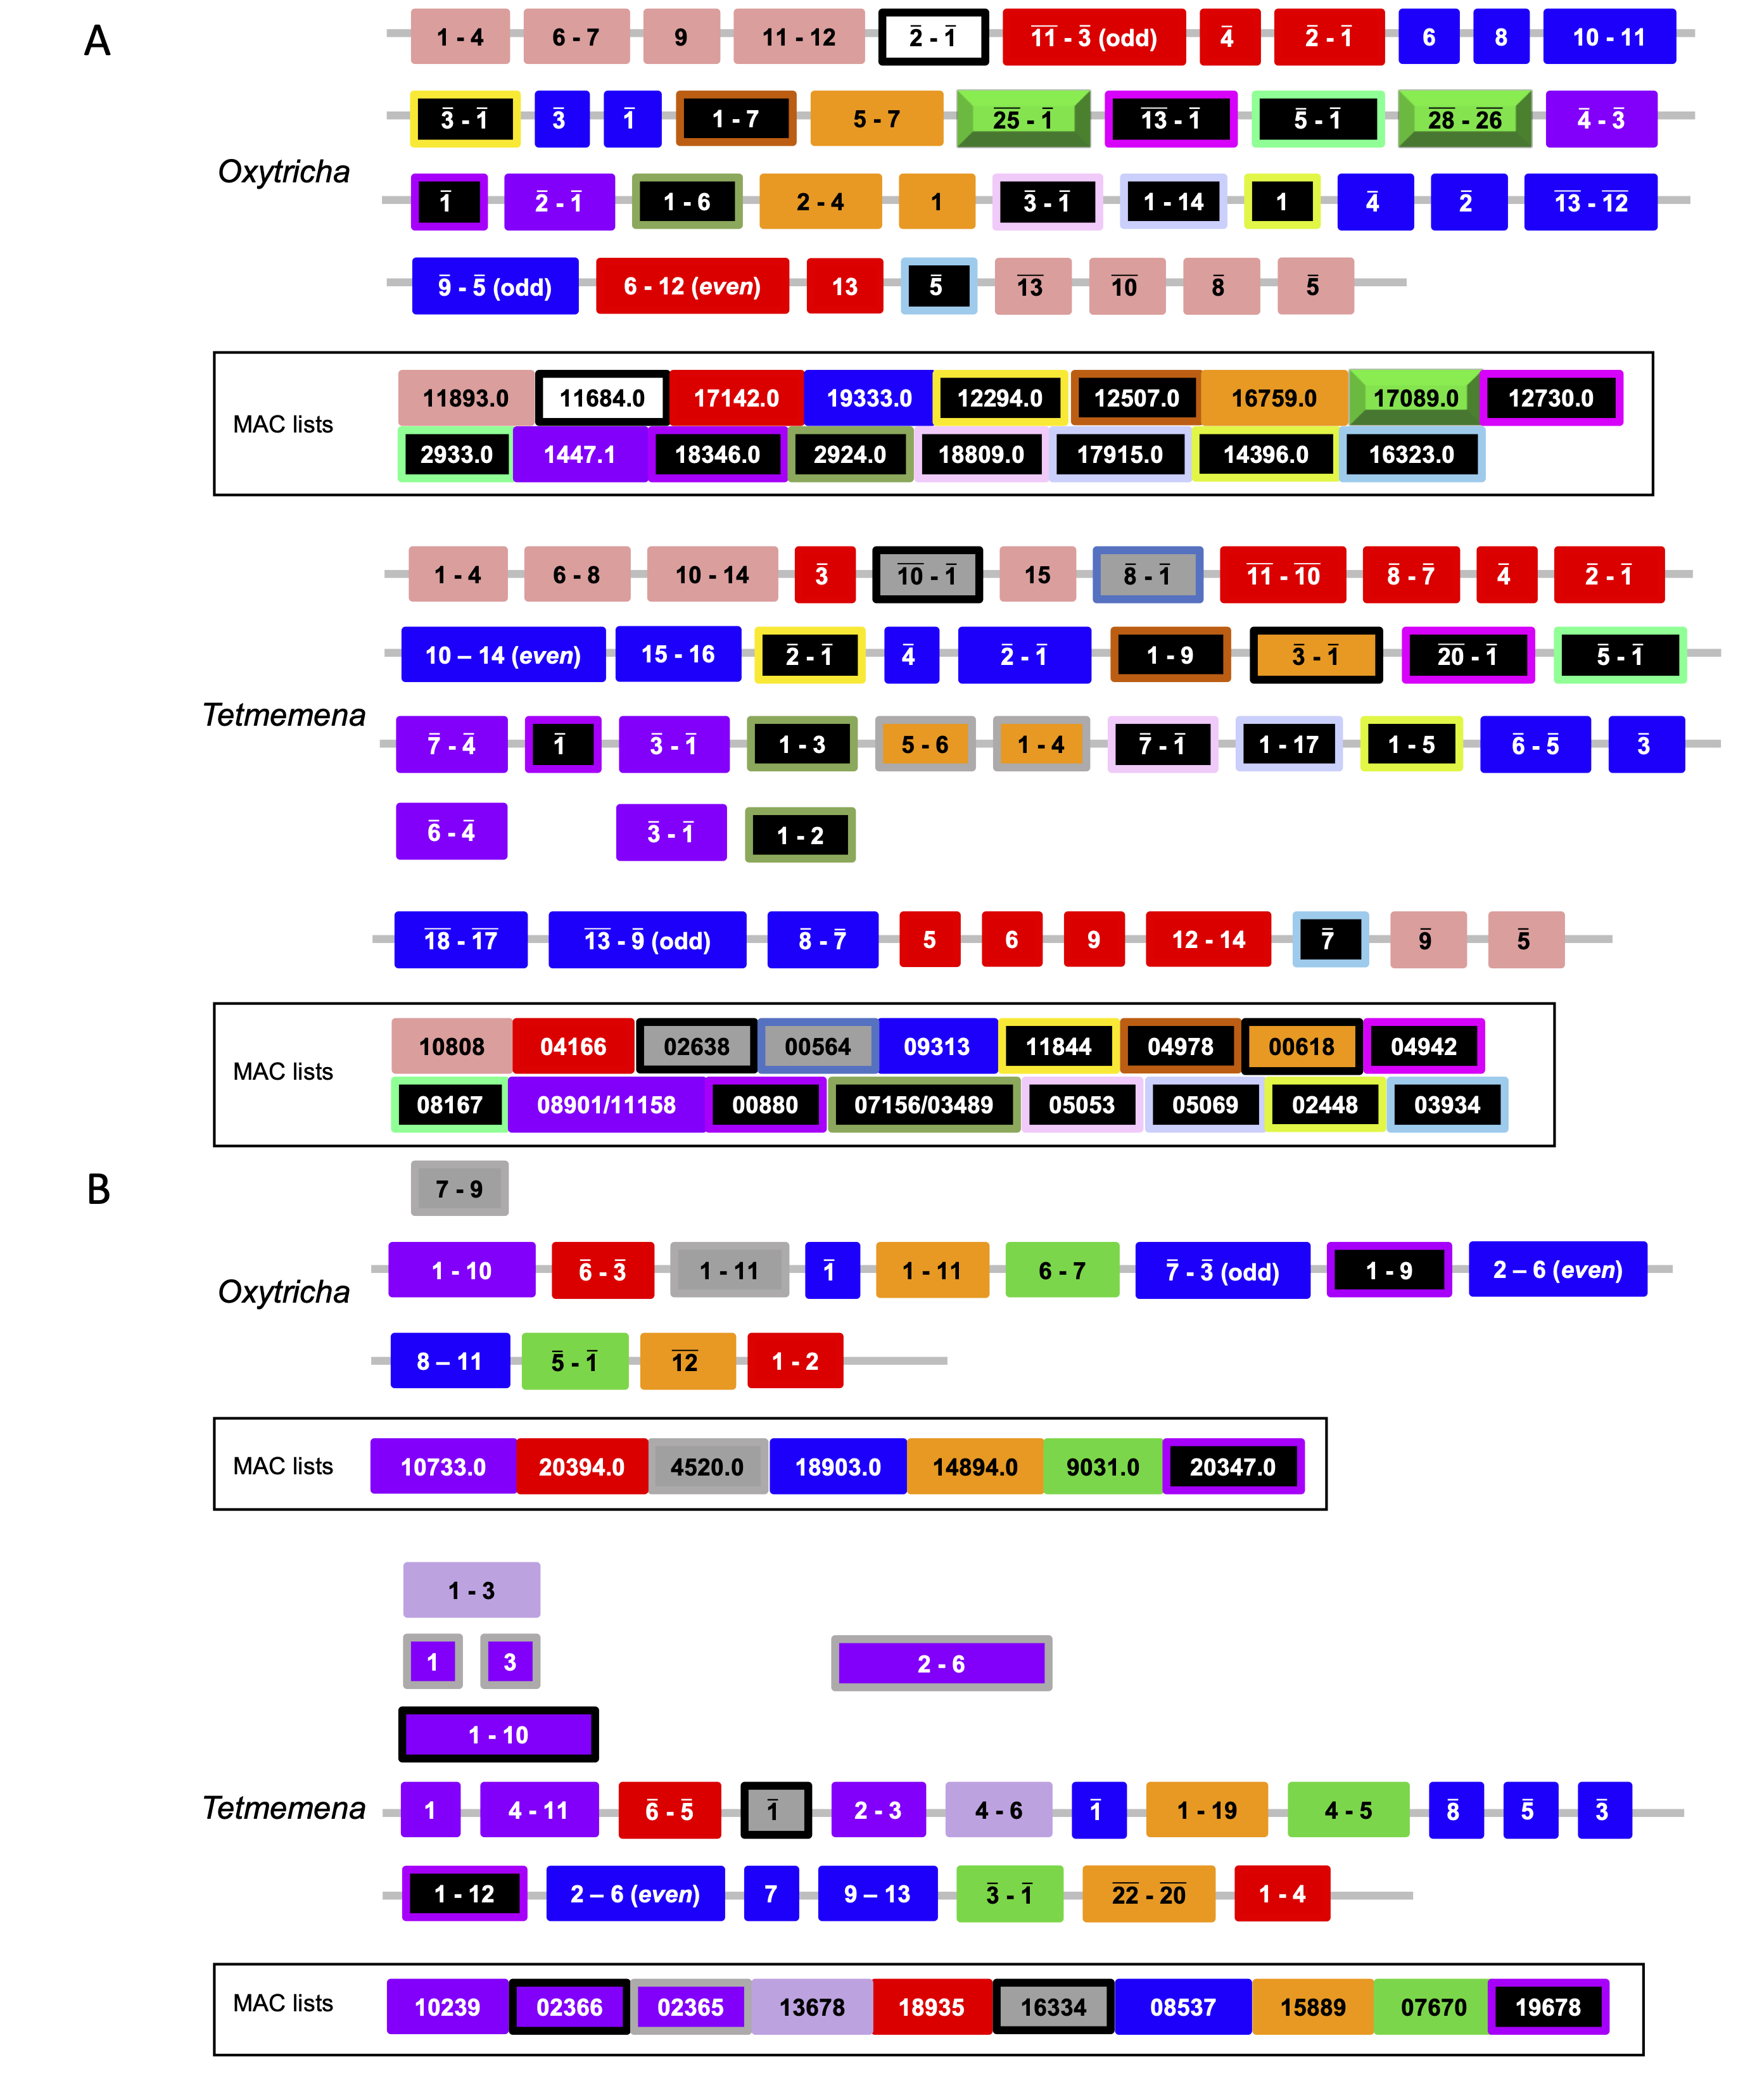

Supplement: supp [file elife-82979-supp-v1.zip › elife_poa_e82979_Figure_6_figure_supplement_1.png]
